# Supplementary material
Source: PubMed Central journal article supplement (PMC3609071)
Supplement: prio-6-407-s02.pdf [file prio-6-407-s02.pdf]

## **Supplemental Material to:**

**Olga Calero, María Jesús Bullido, Jordi Clarimón, Rafael Hortigüela, Ana Frank-García, Pablo Martínez-Martín, Alberto Lleó, María Jesús Rey, Isabel Sastre, Alberto Rábano, Jesús de Pedro-Cuesta, Isidro Ferrer and Miguel Calero**

**Genetic variability of the gene cluster CALHM1-3 in sporadic Creutzfeldt-Jakob disease**

**Prion 2012; 6(4)**

**<http://www.landesbioscience.com/journals/prion/article/20785/>**

**Supplementary Table 1.** Specific primers used for sequence analysis of *CALHM1*, 2 and 3 coding regions.

| <b>Region</b>               | <b>Primer</b> | <b>Nucleotide Sequence 5'-3'</b> | <b>Orientation</b> |
|-----------------------------|---------------|----------------------------------|--------------------|
| <b><i>CALHM1</i>_Exon 1</b> | CALHM1A       | GGTCCCAGCCAGGAGAGCC              | Forward            |
|                             | CALHM1B       | GAGCTCCACCTGAGCAGAGGC            | Reverse            |
| <b><i>CALHM1</i>_Exon 2</b> | CALHM1C       | TGGGAGTCTGAACAGGCTCG             | Forward            |
|                             | CALHM1D       | CCCAGCACTGAAACCCTTCC             | Reverse            |
| <b><i>CALHM2</i>_Exon 1</b> | CALHM2A       | TCAGAGGGAAACACTTATCGGTC          | Forward            |
|                             | CALHM2B       | GCTTTAGCACTAGGCCATCCC            | Reverse            |
| <b><i>CALHM2</i>_Exon 2</b> | CALHM2C       | CCTGCTTCTCTTACCCAAGCAG           | Forward            |
|                             | CALHM2D       | GTGGGGTTCAGTTTGGGACC             | Reverse            |
| <b><i>CALHM3</i>_Exon 1</b> | CALHM3A       | GGCCCTTGGAAGCAGAGAG              | Forward            |
|                             | CALHM3B       | GCAGTACCTGTAGGGTGGGTG            | Reverse            |
| <b><i>CALHM3</i>_Exon 2</b> | CALHM3C       | CTCTACACTGGGAGCTGCAGTC           | Forward            |
|                             | CALHM3D       | CTCTCAGAGCCTGCTTCCTCAC           | Reverse            |
| <b><i>CALHM3</i>_Exon 3</b> | CALHM3E       | GGATTAGGCCCCCACTCACATC           | Forward            |
|                             | CALHM3F       | CACGGCCTGGAAAGACTCC              | Reverse            |
